# Supplementary material for: Inhibition by stabilization: targeting the Plasmodium falciparum aldolase–TRAP complex
Source: Springer Nature journal article supplement (doi:10.1186/s12936-015-0834-9), 2015-08-19
Supplement: MOESM1 [file 9761538]

**Additional file 1: Clustal-W sequence alignment of *Plasmodium*, Human and Rabbit aldolase.** Human and rabbit aldolase share 360/364 residues (99% sequence identity).

CLUSTAL W (1.83) multiple sequence alignment

```

HumanA      MPHSYPALS-----AEQKKE LSDIALRIVAPGKGILAADES VGSMAKRLSQIGVENTEENRRLYRQVLF SADDRVKKCI
RabbitC     MPHSYPALS-----AEQKKE LSDIALRIVAPGKGILAADES VGSMAKRLSQIGVENTEENRRLYRQVLF SADDRVKKCI
P.falciparum MAHCTEYMNAPKLPADVAEELATTAQKLVQAGKGILAADESTQTIKKRFDNIKLENTIENRAS YRDLLFGTK-GLGKFI
*. * .      * : ** : * : * .*****. : : ** : * : * * * * * : * * . : * *

HumanA      GGVIFFHETLYQKDDNGVPFVRTIQDKGIVVGIKVDKGVVPLAGTDGETTTQGLDGLSERCAQYKKGADFAKWRCVLKI
RabbitC     GGVIFFHETLYQKDDNGVPFVHTIQDKGIVVGIKVDKGVVPLAGTDGETTTQGLDGLSERCAQYKKGADFAKWRCVLKI
P.falciparum SGAILFEETLFQKNEAGVPMVNLHNENIIPGIKVDKGLVNIPTDEEKSTQGLDGLAERCKEYKAGARFAKWRTVLVI
.*.*.*.***:**: **:* . : : : .: *****:* . * * .:*****:* * * * * * * * * * *

HumanA      S--ERTPSALAI LENANVLARYASICQNGI VPIVEPEILPDGDHDLKRCQYVTEKVLAAVYKALSDHHVYLEGTL LKPN
RabbitC     S--ERTPSALAI LENANVLARYASICQNGI VPIVEPEILPDGDHDLKRCQYVTEKVLAAVYKALSDHHVYLEGTL LKPN
P.falciparum DTAKGKPTDLSIHETAWGLARYASICQNR LVPIVEPEILADGPHSIEVCAVVTQKVLSCVFKALQENGV LLEGALLKPN
. : .: * : * * * ***** :*****.* * .: * * :***:.*:***.: : * **:*

HumanA      MVTPGHACPIKYTPEEIAMATVTALRRTVPPAVPGVTFLSGGQSEEEASFNLNAINRCPLRPWAL TFSYGRALQASALN
RabbitC     MVTPGHACPIKYSPEEIAMATVTALRRTVPPAVPGVTFLSGGQSEEEASLNLNAINRCPLRPWAL TFSYGRALQASALN
P.falciparum MVTAGYECTAKTTQDVGF LTVRTL RRTVPPALPGVVFLSGGQSEEEASVNLNSINAL-GPHPWAL TFSYGRALQASV LN
***.*: * . * : : : .: * * :*****:* * .*****.* * : * * :*****.* *

HumanA      AWRGQRDNAGAATEEFIKRAEVNGLAAQKG YEGSGEDGGAAAQSLY IANHAYL
RabbitC     AWRGQDNAGAATEEFIKRAEVNGLAAQKG YEGSGEDGGAAAQSLY IANHAY-
P.falciparum TWQGGKKNVAKAREVLLQRAEANSLATY GKYKG-GAGGENAGASLYEKKYVY-
*: * : : : .: * * : : * * . * * : * * * * * * * * * * * * * * * * * *

```
