# Supplementary material for: Inhibition by stabilization: targeting the Plasmodium falciparum aldolase–TRAP complex
Source: Springer Nature journal article supplement (doi:10.1186/s12936-015-0834-9), 2015-08-19
Supplement: MOESM2 [file 9761538]

**Additional file 2:** Pockets in the unliganded aldolase crystal structure (PDB ID: 1a5c). Pocket numbers correspond to those in Figure 1C of the main text. Key pockets are highlighted, and non-conserved residues contacting each pocket are listed in bold.

| Pocket # | Volume (Å <sup>3</sup> ) | Area (Å <sup>2</sup> ) | Radius (Å) | Nonsphericity | Aldolase Residues Contacting Pocket                                                      | TRAP Residues Contacting Pocket |
|----------|--------------------------|------------------------|------------|---------------|------------------------------------------------------------------------------------------|---------------------------------|
| 1        | 239.11                   | 325.36                 | 3.85       | 1.75          | Q26, V29-G32, E231, P269, A270, P272, N294, A295, G297-H299, W301-T304, T344, Y345, K347 |                                 |
| 2        | 281.97                   | 326.56                 | 4.07       | 1.57          | E196-A199, C208, N238-M239, T241-Y244, C246-A248, T250-T252, V255, L277-Q281, E285, N289 |                                 |
| 3        | 227.86                   | 255.08                 | 3.79       | 1.41          | S41, T44, F84, <b>E85</b> , K112- <b>L117</b> , R138, Y142, R153                         | <b>N606</b>                     |
| 4        | 109.52                   | 179.08                 | 2.97       | 1.62          | K27, Q30, K33, H103, N106-P109, R148                                                     |                                 |
| 5        | 133.22                   | 169.82                 | 3.17       | 1.35          | P10-L13, R179, S182, I183, Q185, Q186, N226-V228                                         |                                 |
| 6        | 188.41                   | 174.08                 | 3.56       | 1.10          | A37, D39, E40, K151, E194, K236, L277-G279, S306-A310                                    | <b>W605, N606</b>               |
| 7        | 118.41                   | 156.06                 | 3.05       | 1.34          | N60, S63, D66, N92, E93, W319, G321, K323, V326                                          |                                 |
| 8        | 102.94                   | 126.75                 | 2.91       | 1.19          | K47, R48, <b>N51</b> , I52, R309, A313, L316, N317                                       | <b>W605</b>                     |
