# Supplementary material for: Inhibition by stabilization: targeting the Plasmodium falciparum aldolase–TRAP complex
Source: Springer Nature journal article supplement (doi:10.1186/s12936-015-0834-9), 2015-08-19
Supplement: MOESM4 [file 9761538]

#### Additional file 4:

Supplemental Data - VLS hitlists and Compound Structures and Properties  
>300,000 compounds were screened against 3 models of the *Plasmodium* aldolase-TRAP complex. The following tables list the final sets of compounds obtained for each receptor:

The table headings are defined as follows:

- Compound #: a unique number (1-60) assigned to each compound
- VLS score: the lowest energy score obtained for each compound after 3 rounds of screening against the receptor model
- Docking score: the energy score obtained for each compound when it was re-docking to its receptor using a slower, more robust docking algorithm
- Score difference: (Docking score) – (VLS score)
- RMSD: root-mean-squared deviation of the docked position and conformation of the compound between the VLS and re-docking runs

#### VLS hits for “2pc4 model”

| Compound # | VLS Score | Docking Score | Score Difference | RMSD (Å) |
|------------|-----------|---------------|------------------|----------|
| 4          | -37.50    | -36.92        | 0.58             | 0.08     |
| 40         | -34.07    | -37.10        | -3.03            | 0.00     |
| 44         | -43.32    | -43.28        | 0.05             | 0.00     |
| 45         | -46.36    | -36.59        | 9.77             | 1.98     |
| 47         | -36.64    | -37.11        | -0.47            | 2.14     |
| 56         | -32.92    | -32.18        | 0.75             | 1.73     |

#### VLS hits for “falciparum model”

| Compound # | VLS Score | Docking Score | Score Difference | RMSD (Å) |
|------------|-----------|---------------|------------------|----------|
| 3          | -36.51    | -36.50        | 0.01             | 0.00     |
| 5          | -33.66    | -33.42        | 0.24             | 0.75     |
| 15         | -36.22    | -33.04        | 3.18             | 0.21     |
| 22         | -33.63    | -35.83        | -2.20            | 0.05     |
| 32         | -37.62    | -34.41        | 3.21             | 0.48     |
| 37         | -34.12    | -33.16        | 0.96             | 0.09     |
| 40         | -33.30    | -36.58        | -3.28            | 0.08     |
| 43         | -32.39    | -32.34        | 0.06             | 0.02     |
| 46         | -32.55    | -32.56        | -0.01            | 0.00     |
| 53         | -32.21    | -32.23        | -0.03            | 0.01     |
| 55         | -37.23    | -37.01        | 0.22             | 0.10     |

## VLS hits for “gapped-pocket model”

| Compound # | VLS Score | Docking Score | Score Difference | RMSD (Å) |
|------------|-----------|---------------|------------------|----------|
| 1          | -32.43    | -33.19        | -0.76            | 0.03     |
| 2          | -36.41    | -42.87        | -6.47            | 0.07     |
| 5          | -36.46    | -36.53        | -0.06            | 0.75     |
| 6          | -37.08    | -36.52        | 0.56             | 0.03     |
| 7          | -35.10    | -35.59        | -0.49            | 0.05     |
| 8          | -33.05    | -33.11        | -0.06            | 0.03     |
| 9          | -36.10    | -33.41        | 2.69             | 0.17     |
| 10         | -35.37    | -35.32        | 0.05             | 1.87     |
| 11         | -32.71    | -32.41        | 0.30             | 1.70     |
| 12         | -35.11    | -32.30        | 2.81             | 2.72     |
| 13         | -33.02    | -34.97        | -1.95            | 2.12     |
| 14         | -35.00    | -34.46        | 0.54             | 0.01     |
| 16         | -35.12    | -34.91        | 0.21             | 0.00     |
| 17         | -34.25    | -34.32        | -0.07            | 0.02     |
| 18         | -35.05    | -34.92        | 0.13             | 0.00     |
| 19         | -34.49    | -34.12        | 0.37             | 0.00     |
| 20         | -34.78    | -32.09        | 2.69             | 2.22     |
| 21         | -35.30    | -35.28        | 0.02             | 0.03     |
| 23         | -37.96    | -43.33        | -5.37            | 0.09     |
| 24         | -32.67    | -32.79        | -0.11            | 0.03     |
| 25         | -32.61    | -32.44        | 0.17             | 0.01     |
| 26         | -37.45    | -37.65        | -0.20            | 0.00     |
| 27         | -35.54    | -41.36        | -5.83            | 0.05     |
| 28         | -34.21    | -33.17        | 1.03             | 2.21     |
| 29         | -35.18    | -42.15        | -6.97            | 2.27     |
| 30         | -33.65    | -33.36        | 0.30             | 1.81     |
| 31         | -34.27    | -33.76        | 0.51             | 0.02     |
| 33         | -39.25    | -38.68        | 0.57             | 0.03     |
| 34         | -36.53    | -36.82        | -0.29            | 0.00     |
| 35         | -32.47    | -33.42        | -0.95            | 1.81     |
| 36         | -33.16    | -32.87        | 0.29             | 0.01     |
| 38         | -35.19    | -35.18        | 0.01             | 0.00     |
| 39         | -38.55    | -37.22        | 1.34             | 0.04     |
| 41         | -38.86    | -38.45        | 0.41             | 0.00     |
| 42         | -34.08    | -34.01        | 0.08             | 0.00     |
| 48         | -32.34    | -33.15        | -0.81            | 4.14     |
| 49         | -37.85    | -37.39        | 0.46             | 0.03     |
| 50         | -32.98    | -36.85        | -3.87            | 0.68     |
| 51         | -37.08    | -37.01        | 0.08             | 0.03     |
| 52         | -38.58    | -37.99        | 0.60             | 6.84     |
| 54         | -35.14    | -41.21        | -6.06            | 0.09     |
| 57         | -35.55    | -35.89        | -0.34            | 0.00     |
| 58         | -33.41    | -33.16        | 0.25             | 1.66     |

| Compound # | VLS Score | Docking Score | Score Difference | RMSD (Å) |
|------------|-----------|---------------|------------------|----------|
| 59         | -32.74    | -32.69        | 0.05             | 2.26     |
| 60         | -34.63    | -32.09        | 2.53             | 0.02     |

### Compound Structures & Properties

The compounds in the ChemBridge (San Diego, CA) screening library are generally uncharacterized. However, several physical and chemical features including solubility, hydrophobicity, flexibility, polarity, etc., can be predicted based on the compounds' formula and molecular structure. These features are listed below for each of the final 60 VLS hits.

**Compound # 1**

Chembridge ID 5112957

**MW** 270.3  
**Formula** C<sub>15</sub> H<sub>14</sub> N<sub>2</sub> O<sub>3</sub>  
**Name** 4-hydroxy-N'-(4-methoxybenzylidene) benzohydrazide  
**LogSW** -2.453  
**RB** 3  
**tPSA** 70.92  
**hDon** 2  
**hAcc** 4  
**cLogP** 2.18  
**molLogP** 3.01264  
**SMILES** C(C=C(O)C=C1)=C1C(=O)N/N=C/C(C=CC(=C1)OC)=C1

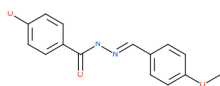**Compound # 2**

Chembridge ID 5112979

**MW** 285.3  
**Formula** C<sub>14</sub> H<sub>11</sub> N<sub>3</sub> O<sub>4</sub>  
**Name** 4-hydroxy-N'-(2-nitrobenzylidene) benzohydrazide  
**LogSW** -2.799  
**RB** 3  
**tPSA** 104.83  
**hDon** 2  
**hAcc** 5  
**cLogP** 2  
**molLogP** 2.47206  
**SMILES** O=N(=O)C(C=CC=C1)=C1/C=N/NC(=O)C(C=CC(O)=C1)=C1

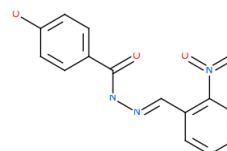**Compound # 3**

Chembridge ID 5121901

**MW** 192.2  
**Formula** C<sub>9</sub> H<sub>12</sub> N<sub>4</sub> O  
**Name** 1-(4-aminophenyl)-1-ethanone semicarbazone  
**LogSW** -1.833  
**RB** 2  
**tPSA** 93.5  
**hDon** 3  
**hAcc** 2  
**cLogP** 1.44  
**molLogP** .889302  
**SMILES** C(C=C(N)C=C1)=C1/C(=N)NC(=O)N)C

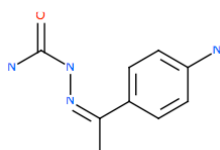**Compound # 4**

Chembridge ID 5153389

**MW** 223.2  
**Formula** C<sub>9</sub> H<sub>9</sub> N<sub>3</sub> O<sub>4</sub>  
**Name** N'-acetyl-2-nitrobenzohydrazide  
**LogSW** -2.179  
**RB** 2  
**tPSA** 101.34  
**hDon** 2  
**hAcc** 4  
**cLogP** -.41  
**molLogP** .041457  
**SMILES** O=N(=O)C(C=CC=C1)=C1C(=O)NNC(=O)C

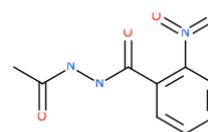

MW: molecular weight, g/mol  
 LogSW: predicted aqueous solubility  
 RB: # of rotatable bonds  
 tPSA: total polar surface area (Angstroms<sup>2</sup>)

hDon: # of hydrogen-bond donors  
 hAcc: # of hydrogen-bond acceptors  
 cLogP: predicted octanol-water partition coefficient (Chembridge algorithm)  
 molLogP: predicted octanol-water partition coefficient (Molsoft algorithm)  
 SMILES: Simplified Molecular Input Line Entry Specification

**Compound # 5**

Chembridge ID 5153799

**MW** 225.2  
**Formula** C<sub>9</sub> H<sub>7</sub> N O<sub>4</sub> S  
**Name** 8-hydroxy-5-quinolinesulfonic acid

**LogSW** .343  
**RB** 1  
**tPSA** 87.49  
**hDon** 2  
**hAcc** 5  
**cLogP** -.71

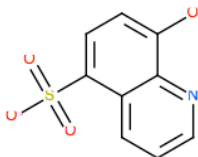

**molLogP** .616233  
**SMILES** C(C1)=C(C2C(C=1O)=NC=CC=2)S(=O)(=O)[O-]

**Compound # 6**

Chembridge ID 5227275

**MW** 325.2  
**Formula** C<sub>12</sub> H<sub>9</sub> Br N<sub>2</sub> O<sub>2</sub> S  
**Name** N'-[(5-bromo-2-thienyl)methylene]-4-hydroxybenzohydrazide

**LogSW** -3.391  
**RB** 3  
**tPSA** 61.69  
**hDon** 2  
**hAcc** 3  
**cLogP** 2.81

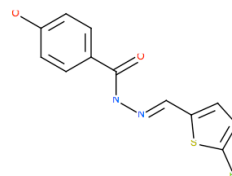

**molLogP** 3.62692  
**SMILES** C(C=C(S1)/C=N/NC(=O)C(C=CC(=C2)O)=C2)=C1[Br]

**Compound # 7**

Chembridge ID 5227278

**MW** 291.3  
**Formula** C<sub>12</sub> H<sub>9</sub> N<sub>3</sub> O<sub>4</sub> S  
**Name** 4-hydroxy-N'-[(5-nitro-2-thienyl)methylene]benzohydrazide

**LogSW** -2.62  
**RB** 3  
**tPSA** 104.83  
**hDon** 2  
**hAcc** 5  
**cLogP** 1.74

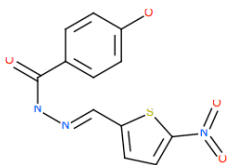

**molLogP** 2.75402  
**SMILES** C(C=C(S1)/C=N/NC(=O)C(C=CC(=C2)O)=C2)=C1N(=O)=O

**Compound # 8**

Chembridge ID 5227280

**MW** 260.3  
**Formula** C<sub>13</sub> H<sub>12</sub> N<sub>2</sub> O<sub>2</sub> S  
**Name** 4-hydroxy-N'-[(3-methyl-2-thienyl)methylene]benzohydrazide

**LogSW** -2.569  
**RB** 3  
**tPSA** 61.69  
**hDon** 2  
**hAcc** 3  
**cLogP** 2.4

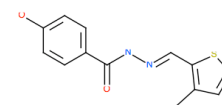

**molLogP** 3.07727  
**SMILES** C(=N/NC(=O)C(C=CC(O)=C1)=C1)/C(SC=C1)=C1C

MW: molecular weight, g/mol  
 LogSW: predicted aqueous solubility  
 RB: # of rotatable bonds  
 tPSA: total polar surface area (Angstroms<sup>2</sup>)

hDon: # of hydrogen-bond donors  
 hAcc: # of hydrogen-bond acceptors  
 cLogP: predicted octanol-water partition coefficient (Chembridge algorithm)  
 molLogP: predicted octanol-water partition coefficient (Molsoft algorithm)  
 SMILES: Simplified Molecular Input Line Entry Specification

**Compound # 9**

Chembridge ID 5227289

**MW** 286.3  
**Formula** C<sub>15</sub> H<sub>14</sub> N<sub>2</sub> O<sub>4</sub>  
**Name** 4-hydroxy-N'-(2-hydroxy-3-methoxybenzylidene)benzohydrazide

**LogSW** -1.938**RB** 3**tPSA** 91.15**hDon** 3**hAcc** 5**cLogP** 1.44**molLogP** 2.51318

**SMILES** C(=N/NC(=O)C(C=CC(O)=C1)=C1)/C(C=CC1)=C(C=1OC)O

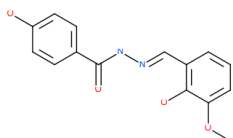**Compound # 10**

Chembridge ID 5227292

**MW** 229.2  
**Formula** C<sub>12</sub> H<sub>11</sub> N<sub>3</sub> O<sub>2</sub>  
**Name** 4-hydroxy-N'-(1H-pyrrol-2-ylmethylene)benzohydrazide

**LogSW** -1.027**RB** 3**tPSA** 77.48**hDon** 3**hAcc** 3**cLogP** .86**molLogP** 1.87264

**SMILES** N(C=CC1)C=1/C=N/NC(=O)C(C=CC(=C1)O)=C1

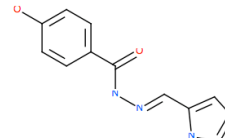**Compound # 11**

Chembridge ID 5227298

**MW** 286.4  
**Formula** C<sub>15</sub> H<sub>14</sub> N<sub>2</sub> O<sub>2</sub> S  
**Name** 4-hydroxy-N'-[4-(methylthio)benzylidene]benzohydrazide

**LogSW** -3.117**RB** 3**tPSA** 61.69**hDon** 2**hAcc** 3**cLogP** 2.82**molLogP** 3.60632

**SMILES** C(C=C(O)C=C1)=C1C(=O)N/N=C/C(C=CC(=C1)SC)=C1

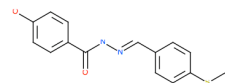**Compound # 12**

Chembridge ID 5227303

**MW** 256.3  
**Formula** C<sub>14</sub> H<sub>12</sub> N<sub>2</sub> O<sub>3</sub>  
**Name** 4-hydroxy-N'-(3-hydroxybenzylidene)benzohydrazide

**LogSW** -1.847**RB** 3**tPSA** 81.92**hDon** 3**hAcc** 4**cLogP** 1.59**molLogP** 2.66317

**SMILES** C(C=C(O)C=C1)=C1C(=O)N/N=C/C(C=CC(=C1)O)=C1

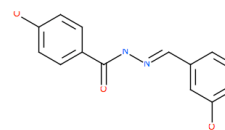

|                                                          |                                                                             |
|----------------------------------------------------------|-----------------------------------------------------------------------------|
| MW: molecular weight, g/mol                              | hDon: # of hydrogen-bond donors                                             |
| LogSW: predicted aqueous solubility                      | hAcc: # of hydrogen-bond acceptors                                          |
| RB: # of rotatable bonds                                 | cLogP: predicted octanol-water partition coefficient (Chembridge algorithm) |
| tPSA: total polar surface area (Angstroms <sup>2</sup> ) | molLogP: predicted octanol-water partition coefficient (Molsoft algorithm)  |
|                                                          | SMILES: Simplified Molecular Input Line Entry Specification                 |

**Compound # 13**

Chembridge ID 5227326

**MW** 322.3  
**Formula** C<sub>18</sub> H<sub>14</sub> N<sub>2</sub> O<sub>4</sub>  
**Name** 3,5-dihydroxy-N'-[(2-hydroxy-1-naphthyl)methylene]benzohydrazide

**LogSW** -2.849  
**RB** 3  
**tPSA** 102.15  
**hDon** 4  
**hAcc** 5  
**cLogP** 2.2

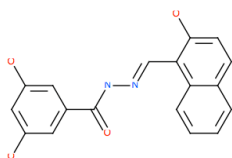**molLogP** 3.61119

**SMILES** O=C(O)C(O)=C1=C(O)N/N=C/C(O)=CC1=C2C=1C=CC=C2

**Compound # 14**

Chembridge ID 5252622

**MW** 352.3  
**Formula** C<sub>16</sub> H<sub>17</sub> F N<sub>2</sub> O<sub>6</sub>  
**Name** N-[2-(acetylamino)-3-(4-fluorophenyl)acryloyl]glutamic acid

**LogSW** -3.028  
**RB** 8  
**tPSA** 132.8  
**hDon** 4  
**hAcc** 6  
**cLogP** -0.6

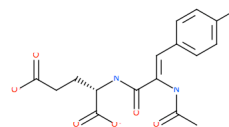**molLogP** .451621

**SMILES** C(/C(C=CC(F)=C1)=C1)=C(/C(=O)N[C@H](C(=O)[O-])CCC(=O)[O-])NC(=O)C

**Compound # 15**

Chembridge ID 5256251

**MW** 298.3  
**Formula** C<sub>14</sub> H<sub>10</sub> N<sub>4</sub> O<sub>4</sub>  
**Name** N-(6-anilino-4,7-dioxo-4,7-dihydro-2,1,3-benzoxadiazol-5-yl)acetamide

**LogSW** -2.17  
**RB** 3  
**tPSA** 114.19  
**hDon** 2  
**hAcc** 6  
**cLogP** .93

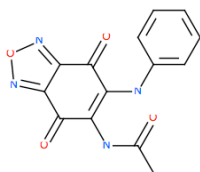**molLogP** .926853

**SMILES** O=C(C(=NON1)C=1C(=O)C1NC(C=CC=C2)=C2)C=1NC(=O)C

**Compound # 16**

Chembridge ID 5256921

**MW** 301.3  
**Formula** C<sub>14</sub> H<sub>11</sub> N<sub>3</sub> O<sub>5</sub>  
**Name** 4-hydroxy-N'-(2-hydroxy-5-nitrobenzylidene)benzohydrazide

**LogSW** -2.5  
**RB** 3  
**tPSA** 125.06  
**hDon** 3  
**hAcc** 6  
**cLogP** 1.97

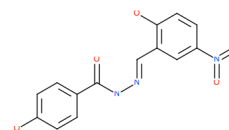**molLogP** 2.21263

**SMILES** C(C(=C(O)C=C1)/C=N/NC(=O)C(C=CC(=C2)O)=C2)=C1N(=O)=O

MW: molecular weight, g/mol  
 LogSW: predicted aqueous solubility  
 RB: # of rotatable bonds  
 tPSA: total polar surface area (Angstroms<sup>2</sup>)

hDon: # of hydrogen-bond donors  
 hAcc: # of hydrogen-bond acceptors  
 cLogP: predicted octanol-water partition coefficient (Chembridge algorithm)  
 molLogP: predicted octanol-water partition coefficient (Molsoft algorithm)  
 SMILES: Simplified Molecular Input Line Entry Specification

**Compound # 17**

Chembridge ID 5264148

**MW** 272.3  
**Formula** C<sub>14</sub> H<sub>12</sub> N<sub>2</sub> O<sub>4</sub>  
**Name** 3,5-dihydroxy-N'-(2-hydroxybenzylidene)benzohydrazide  
**LogSW** -1.486  
**RB** 3  
**tPSA** 102.15  
**hDon** 4  
**hAcc** 5  
**cLogP** 1.03  
**molLogP** 2.28373  
**SMILES** C(C(O)=CC(O)=C1)=C1C(=O)N/N=C/C(C=CC=C1)=C1O

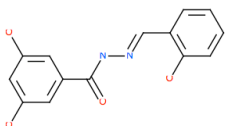**Compound # 18**

Chembridge ID 5266986

**MW** 272.3  
**Formula** C<sub>14</sub> H<sub>12</sub> N<sub>2</sub> O<sub>4</sub>  
**Name** 3,4-dihydroxy-N'-(2-hydroxybenzylidene)benzohydrazide  
**LogSW** -1.545  
**RB** 3  
**tPSA** 102.15  
**hDon** 4  
**hAcc** 5  
**cLogP** 1.1  
**molLogP** 2.16371  
**SMILES** C(C(O)=C(O)C=C1)=C1C(=O)N/N=C/C(C=CC=C1)=C1O

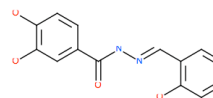**Compound # 19**

Chembridge ID 5267209

**MW** 317.3  
**Formula** C<sub>14</sub> H<sub>11</sub> N<sub>3</sub> O<sub>6</sub>  
**Name** 3,4-dihydroxy-N'-(2-hydroxy-5-nitrobenzylidene)benzohydrazide  
**LogSW** -2.189  
**RB** 3  
**tPSA** 145.29  
**hDon** 4  
**hAcc** 7  
**cLogP** 1.47  
**molLogP** 1.83319  
**SMILES** C(C(=C(O)C=C1)/C=N/NC(=O)C(C=CC(=C2O)O)=C2)=C1N(=O)=O

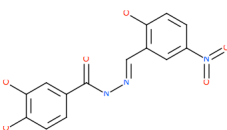**Compound # 20**

Chembridge ID 5267603

**MW** 335.7  
**Formula** C<sub>14</sub> H<sub>10</sub> Cl N<sub>3</sub> O<sub>5</sub>  
**Name** N'-(4-chloro-3-nitrobenzylidene)-3,4-dihydroxybenzohydrazide  
**LogSW** -3.183  
**RB** 3  
**tPSA** 125.06  
**hDon** 3  
**hAcc** 6  
**cLogP** 2.02  
**molLogP** 2.80693  
**SMILES** C(C(O)=C(C=C1)O)=C1C(=O)N/N=C/C(C=CC([Cl])=C1N(=O)=O)=C1

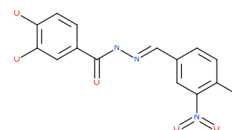

MW: molecular weight, g/mol  
 LogSW: predicted aqueous solubility  
 RB: # of rotatable bonds  
 tPSA: total polar surface area (Angstroms<sup>2</sup>)

hDon: # of hydrogen-bond donors  
 hAcc: # of hydrogen-bond acceptors  
 cLogP: predicted octanol-water partition coefficient (Chembridge algorithm)  
 molLogP: predicted octanol-water partition coefficient (Molsoft algorithm)  
 SMILES: Simplified Molecular Input Line Entry Specification



**Compound # 21**

Chembridge ID 5280090

**MW** 288.3  
**Formula** C<sub>14</sub> H<sub>12</sub> N<sub>2</sub> O<sub>5</sub>  
**Name** N'-(2,3-dihydroxybenzylidene)-3,5-dihydroxybenzohydrazide

**LogSW** -1.09**RB** 3**tPSA** 122.38**hDon** 5**hAcc** 6**cLogP** 0.43**molLogP** 1.90429

**SMILES** C(C(O)=CC(O)=C1)=C1C(=O)N/N=C/C(C=CC1)=C(C=1O)O

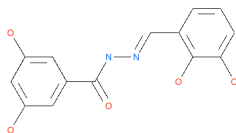**Compound # 22**

Chembridge ID 5302171

**MW** 209.3  
**Formula** C<sub>9</sub> H<sub>11</sub> N<sub>3</sub> O S  
**Name** 2-(2-methylbenzoyl)hydrazinecarbothioamide

**LogSW** -2.786**RB** 2**tPSA** 67.15**hDon** 3**hAcc** 1**cLogP** 2.41**molLogP** .739915

**SMILES** S=C(N)NNC(=O)C(C=CC=C1)=C1C

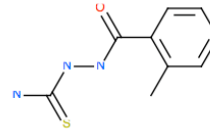**Compound # 23**

Chembridge ID 5312165

**MW** 301.3  
**Formula** C<sub>14</sub> H<sub>11</sub> N<sub>3</sub> O<sub>5</sub>  
**Name** 3,4-dihydroxy-N'-(2-nitrobenzylidene)benzohydrazide

**LogSW** -2.497**RB** 3**tPSA** 125.06**hDon** 3**hAcc** 6**cLogP** 1.51**molLogP** 2.09262

**SMILES** C(C(O)=C(O)C=C1)=C1C(=O)N/N=C/C(C=CC1)=C1N(=O)=O

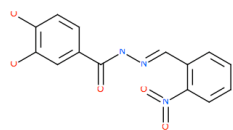**Compound # 24**

Chembridge ID 5315106

**MW** 325.2  
**Formula** C<sub>14</sub> H<sub>10</sub> Cl<sub>2</sub> N<sub>2</sub> O<sub>3</sub>  
**Name** N'-(2,4-dichlorobenzylidene)-3,4-dihydroxybenzohydrazide

**LogSW** -3.715**RB** 3**tPSA** 81.92**hDon** 3**hAcc** 4**cLogP** 3.19**molLogP** 3.85176

**SMILES** C(C(O)=C(C=C1)O)=C1C(=O)N/N=C/C(C=CC1)=C1N(Cl)=O

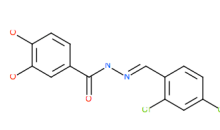

MW: molecular weight, g/mol  
 LogSW: predicted aqueous solubility  
 RB: # of rotatable bonds  
 tPSA: total polar surface area (Angstroms<sup>2</sup>)

hDon: # of hydrogen-bond donors  
 hAcc: # of hydrogen-bond acceptors  
 cLogP: predicted octanol-water partition coefficient (Chembridge algorithm)  
 molLogP: predicted octanol-water partition coefficient (Molsoft algorithm)  
 SMILES: Simplified Molecular Input Line Entry Specification

**Compound # 25**

Chembridge ID 5316181

**MW** 270.3  
**Formula** C<sub>15</sub> H<sub>14</sub> N<sub>2</sub> O<sub>3</sub>  
**Name** 3,4-dihydroxy-N'-(2-methylbenzylidene) benzohydrazide  
**LogSW** -2.522  
**RB** 3  
**tPSA** 81.92  
**hDon** 3  
**hAcc** 4  
**cLogP** 2.26  
**molLogP** 2.82429  
**SMILES** C(C(O)=C(O)C=C1)=C1C(=O)N/N=C/C(C=CC=C1)=C1C

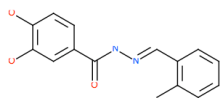**Compound # 26**

Chembridge ID 5318411

**MW** 295.3  
**Formula** C<sub>16</sub> H<sub>13</sub> N<sub>3</sub> O<sub>3</sub>  
**Name** 3,4-dihydroxy-N'-(1H-indol-3-ylmethylene)benzohydrazide  
**LogSW** -2.268  
**RB** 3  
**tPSA** 97.71  
**hDon** 4  
**hAcc** 4  
**cLogP** 1.75  
**molLogP** 2.76061  
**SMILES** N(C(C=CC=C1)=C1C1/C=C/N/NC(=O)C(C=CC(O)=C2O)=C2)C=1

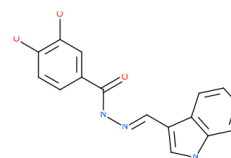**Compound # 27**

Chembridge ID 5320663

**MW** 301.3  
**Formula** C<sub>14</sub> H<sub>11</sub> N<sub>3</sub> O<sub>5</sub>  
**Name** 2,4-dihydroxy-N'-(2-nitrobenzylidene) benzohydrazide  
**LogSW** -3.248  
**RB** 3  
**tPSA** 125.06  
**hDon** 3  
**hAcc** 6  
**cLogP** 2.39  
**molLogP** 2.09262  
**SMILES** C(C=C(O)C1)=C(C(=O)C(=O)N/N=C/C(C=CC=C1)=C1N(=O)=O

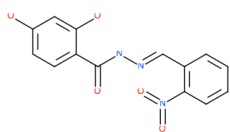**Compound # 28**

Chembridge ID 5321784

**MW** 295.3  
**Formula** C<sub>16</sub> H<sub>13</sub> N<sub>3</sub> O<sub>3</sub>  
**Name** 3,5-dihydroxy-N'-(1H-indol-3-ylmethylene)benzohydrazide  
**LogSW** -2.209  
**RB** 3  
**tPSA** 97.71  
**hDon** 4  
**hAcc** 4  
**cLogP** 1.68  
**molLogP** 2.88063  
**SMILES** N(C(C=CC=C1)=C1C1/C=C/N/NC(=O)C(C=C(O)C=C2O)=C2)C=1

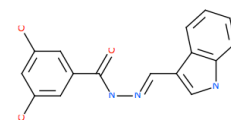

MW: molecular weight, g/mol  
 LogSW: predicted aqueous solubility  
 RB: # of rotatable bonds  
 tPSA: total polar surface area (Angstroms<sup>2</sup>)

hDon: # of hydrogen-bond donors  
 hAcc: # of hydrogen-bond acceptors  
 cLogP: predicted octanol-water partition coefficient (Chembridge algorithm)  
 molLogP: predicted octanol-water partition coefficient (Molsoft algorithm)  
 SMILES: Simplified Molecular Input Line Entry Specification

**Compound # 29**

Chembridge ID 5322358

**MW** 301.3  
**Formula** C<sub>14</sub> H<sub>11</sub> N<sub>3</sub> O<sub>5</sub>  
**Name** 3,5-dihydroxy-N'-(2-nitrobenzylidene) benzohydrazide  
**LogSW** -2.437  
**RB** 3  
**tPSA** 125.06  
**hDon** 3  
**hAcc** 6  
**cLogP** 1.44  
**molLogP** 2.21263  
**SMILES** O=N(=O)C(C=CC=C1)=C1/C=N/NC(=O)C(C=C(O)C=C1O)=C1

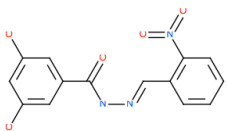**Compound # 30**

Chembridge ID 5331708

**MW** 258.3  
**Formula** C<sub>14</sub> H<sub>11</sub> F N<sub>2</sub> O<sub>2</sub>  
**Name** N'-(2-fluorobenzylidene)-4-hydroxybenzohydrazide  
**LogSW** -2.554  
**RB** 3  
**tPSA** 61.69  
**hDon** 2  
**hAcc** 3  
**cLogP** 2.4  
**molLogP** 3.07193  
**SMILES** C(=N/NC(=O)C(C=CC(O)=C1)=C1)/C(C=CC=C1)=C1F

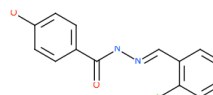**Compound # 31**

Chembridge ID 5336667

**MW** 241.2  
**Formula** C<sub>13</sub> H<sub>11</sub> N<sub>3</sub> O<sub>2</sub>  
**Name** 4-hydroxy-N'-(3-pyridinylmethylene) benzohydrazide  
**LogSW** .271  
**RB** 3  
**tPSA** 74.58  
**hDon** 2  
**hAcc** 4  
**cLogP** .76  
**molLogP** 1.87335  
**SMILES** C(=N/NC(=O)C(C=CC(O)=C1)=C1)/C(C=CC=N1)=C1

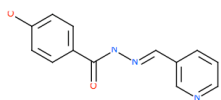**Compound # 32**

Chembridge ID 5377378

**MW** 192.2  
**Formula** C<sub>9</sub> H<sub>12</sub> N<sub>4</sub> O  
**Name** 2-hydrazino-4-(methoxymethyl)-6-methylnicotinonitrile  
**LogSW** -1.594  
**RB** 2  
**tPSA** 83.96  
**hDon** 2  
**hAcc** 3  
**cLogP** .85  
**molLogP** -.071091  
**SMILES** N#CC(C(=CC(C)=N1)COC)=C1NN

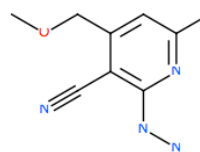

MW: molecular weight, g/mol  
 LogSW: predicted aqueous solubility  
 RB: # of rotatable bonds  
 tPSA: total polar surface area (Angstroms<sup>2</sup>)

hDon: # of hydrogen-bond donors  
 hAcc: # of hydrogen-bond acceptors  
 cLogP: predicted octanol-water partition coefficient (Chembridge algorithm)  
 molLogP: predicted octanol-water partition coefficient (Molsoft algorithm)  
 SMILES: Simplified Molecular Input Line Entry Specification

**Compound # 33**

Chembridge ID 5466567

**MW** 309.3  
**Formula** C17 H15 N3 O3  
**Name** 4-hydroxy-N'-(1H-indol-3-ylmethylene)-3-methoxybenzohydrazide

**LogSW** -3.215**RB** 3**tPSA** 86.71**hDon** 3**hAcc** 4**cLogP** 2.06**molLogP** 3.11008

**SMILES** N(C(C=CC=C1)=C1C1/C=N/NC(=O)C(C=CC(O)=C2OC)=C2)C=1

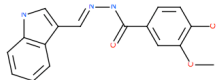**Compound # 34**

Chembridge ID 5466778

**MW** 314.3  
**Formula** C16 H14 N2 O5  
**Name** N'-(1,3-benzodioxol-5-ylmethylene)-4-hydroxy-3-methoxybenzohydrazide

**LogSW** -2.884**RB** 3**tPSA** 89.38**hDon** 2**hAcc** 6**cLogP** 1.63**molLogP** 3.04285

**SMILES** C(C(=C(O)C=C1)OC)=C1C(=O)N/N=C/C(C=CC(OCOC1)=C12)=C2

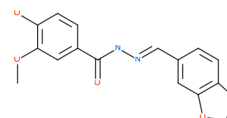**Compound # 35**

Chembridge ID 5475747

**MW** 292.7  
**Formula** C14 H10 Cl F N2 O2  
**Name** N'-(2-chloro-6-fluorobenzylidene)-4-hydroxybenzohydrazide

**LogSW** -3.411**RB** 3**tPSA** 61.69**hDon** 2**hAcc** 3**cLogP** 3.11**molLogP** 3.66622

**SMILES** C(=N/NC(=O)C(C=CC(O)=C1)=C1)/C(C([Cl])=CC=C1)=C1F

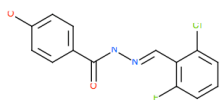**Compound # 36**

Chembridge ID 5493440

**MW** 219.2  
**Formula** C11 H13 N3 O2  
**Name** N'-(2-buten-1-ylidene)-1-methyl-6-oxo-1,6-dihydro-3-pyridinecarbohydrazide

**LogSW** -2.081**RB** 3**tPSA** 63.46**hDon** 1**hAcc** 3**cLogP** 1.5**molLogP** .792339

**SMILES** C(N(C)C(=O)C=C1)=C1C(=O)N/N=C/C=C/C

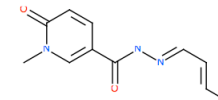

|                                                          |                                                                             |
|----------------------------------------------------------|-----------------------------------------------------------------------------|
| MW: molecular weight, g/mol                              | hDon: # of hydrogen-bond donors                                             |
| LogSW: predicted aqueous solubility                      | hAcc: # of hydrogen-bond acceptors                                          |
| RB: # of rotatable bonds                                 | cLogP: predicted octanol-water partition coefficient (Chembridge algorithm) |
| tPSA: total polar surface area (Angstroms <sup>2</sup> ) | molLogP: predicted octanol-water partition coefficient (Molsoft algorithm)  |
|                                                          | SMILES: Simplified Molecular Input Line Entry Specification                 |

**Compound # 37**

Chembridge ID 5511358

**MW** 154.2  
**Formula** C6 H10 N4 O  
**Name** 2-hydrazino-4-methoxy-6-methylpyrimidine  
**LogSW** -1.266  
**RB** 1  
**tPSA** 73.06  
**hDon** 2  
**hAcc** 3  
**cLogP** 1.1  
**molLogP** .043357  
**SMILES** C(C(C)=NC(NN)=N1)=C1OC

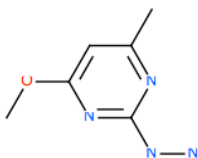**Compound # 38**

Chembridge ID 5521698

**MW** 262.3  
**Formula** C12 H10 N2 O3 S  
**Name** 2,4-dihydroxy-N'-(2-thienylmethylene)benzohydrazide  
**LogSW** -2.489  
**RB** 3  
**tPSA** 81.92  
**hDon** 3  
**hAcc** 4  
**cLogP** 2.29  
**molLogP** 2.4167  
**SMILES** C(C=C(C1O)=C(C=1O)C(=O)N/N=C/C(=CC=C1)S1)

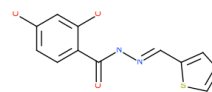**Compound # 39**

Chembridge ID 5532286

**MW** 260.2  
**Formula** C13 H12 N2 O4  
**Name** N'-(2-furylmethylene)-4-hydroxy-3-methoxybenzohydrazide  
**LogSW** -2.158  
**RB** 3  
**tPSA** 84.06  
**hDon** 2  
**hAcc** 5  
**cLogP** 1.24  
**molLogP** 2.11852  
**SMILES** C(C(=C(O)C=C1)OC)=C1C(=O)N/N=C/C(=CC=C1)O1

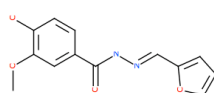**Compound # 40**

Chembridge ID 5562286

**MW** 238.2  
**Formula** C10 H10 N2 O5  
**Name** methyl N-(2-nitrobenzoyl)glycinate  
**LogSW** -2.749  
**RB** 3  
**tPSA** 98.54  
**hDon** 1  
**hAcc** 5  
**cLogP** .13  
**molLogP** .333642  
**SMILES** O=N(=O)C(C=CC=C1)=C1C(=O)NCC(=O)OC

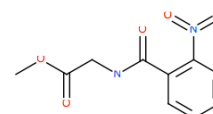

MW: molecular weight, g/mol  
 LogSW: predicted aqueous solubility  
 RB: # of rotatable bonds  
 tPSA: total polar surface area (Angstroms<sup>2</sup>)

hDon: # of hydrogen-bond donors  
 hAcc: # of hydrogen-bond acceptors  
 cLogP: predicted octanol-water partition coefficient (Chembridge algorithm)  
 molLogP: predicted octanol-water partition coefficient (Molsoft algorithm)  
 SMILES: Simplified Molecular Input Line Entry Specification

**Compound # 41**

Chembridge ID 5567417

**MW** 276.3  
**Formula** C<sub>13</sub> H<sub>12</sub> N<sub>2</sub> O<sub>3</sub> S  
**Name** 4-hydroxy-3-methoxy-N'-(2-thienylmethylene)benzohydrazide  
**LogSW** -2.676  
**RB** 3  
**tPSA** 70.92  
**hDon** 2  
**hAcc** 4  
**cLogP** 1.71  
**molLogP** 2.76616  
**SMILES** C(C(=C(O)C=C1)OC)=C1C(=O)N/N=C/C(=CC=C1)S1

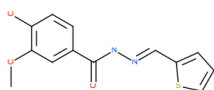**Compound # 42**

Chembridge ID 5630714

**MW** 320.7  
**Formula** C<sub>15</sub> H<sub>13</sub> Cl N<sub>2</sub> O<sub>4</sub>  
**Name** N'-(5-chloro-2-hydroxybenzylidene)-4-hydroxy-3-methoxybenzohydrazide  
**LogSW** -3.017  
**RB** 3  
**tPSA** 91.15  
**hDon** 3  
**hAcc** 5  
**cLogP** 2.41  
**molLogP** 3.2275  
**SMILES** C(C(=C(O)C=C1)OC)=C1C(=O)N/N=C/C(C=C([Cl])C=C1)=C1O

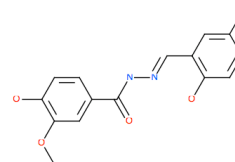**Compound # 43**

Chembridge ID 5774457

**MW** 267.3  
**Formula** C<sub>16</sub> H<sub>13</sub> N O<sub>3</sub>  
**Name** 4-(2-biphenylamino)-4-oxo-2-butenoic acid  
**LogSW** -2.73  
**RB** 4  
**tPSA** 66.4  
**hDon** 2  
**hAcc** 3  
**cLogP** 1.85  
**molLogP** 3.25109  
**SMILES** C(=C/C(=O)[O-])/C(=O)NC(C=CC=C1)=C1C(C=CC=C1)=C1

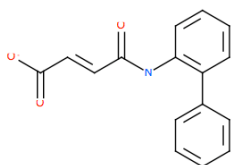**Compound # 44**

Chembridge ID 5798683

**MW** 320.7  
**Formula** C<sub>15</sub> H<sub>13</sub> Cl N<sub>2</sub> O<sub>4</sub>  
**Name** N'-[(2-chlorophenoxy)acetyl]-4-hydroxybenzohydrazide  
**LogSW** -3  
**RB** 5  
**tPSA** 87.66  
**hDon** 3  
**hAcc** 4  
**cLogP** 2.39  
**molLogP** 2.13078  
**SMILES** C(C(=O)NNC(=O)C(C=CC(O)=C1)=C1)OC(C=CC=C1)=C1[Cl]

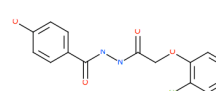

MW: molecular weight, g/mol  
 LogSW: predicted aqueous solubility  
 RB: # of rotatable bonds  
 tPSA: total polar surface area (Angstroms<sup>2</sup>)

hDon: # of hydrogen-bond donors  
 hAcc: # of hydrogen-bond acceptors  
 cLogP: predicted octanol-water partition coefficient (Chembridge algorithm)  
 molLogP: predicted octanol-water partition coefficient (Molsoft algorithm)  
 SMILES: Simplified Molecular Input Line Entry Specification

**Compound # 45**

Chembridge ID 5799663

**MW** 336.7  
**Formula** C<sub>15</sub> H<sub>13</sub> Cl N<sub>2</sub> O<sub>5</sub>  
**Name** N'-[(2-chlorophenoxy)acetyl]-2,4-dihydroxybenzohydrazide  
**LogSW** -3.441  
**RB** 5  
**tPSA** 107.89  
**hDon** 4  
**hAcc** 5  
**cLogP** 2.77  
**molLogP** 1.75134  
**SMILES** C(C=C(O)C1)=C(C(=O)C(=O)NNC(=O)COC(C=CC=C1)=C1[Cl])

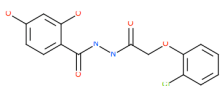**Compound # 46**

Chembridge ID 5851839

**MW** 275.2  
**Formula** C<sub>10</sub> H<sub>8</sub> Cl<sub>2</sub> N<sub>2</sub> O S  
**Name** 5-(2,5-dichlorobenzyl)-2-imino-1,3-thiazolidin-4-one  
**LogSW** -4.478  
**RB** 2  
**tPSA** 52.95  
**hDon** 2  
**hAcc** 2  
**cLogP** 3.83  
**molLogP** 2.44747  
**SMILES** C([C@@H](SC(=N)N1)C1=O)C(C=C(C=C1)[Cl])=C1[Cl]

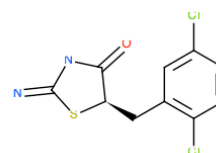**Compound # 47**

Chembridge ID 5853551

**MW** 330.3  
**Formula** C<sub>17</sub> H<sub>18</sub> N<sub>2</sub> O<sub>5</sub>  
**Name** N'-[(2,4-dimethylphenoxy)acetyl]-2,4-dihydroxybenzohydrazide  
**LogSW** -3.719  
**RB** 5  
**tPSA** 107.89  
**hDon** 4  
**hAcc** 5  
**cLogP** 3.15  
**molLogP** 1.83934  
**SMILES** C(C=C(O)C1)=C(C(=O)C(=O)NNC(=O)COC(C=CC(=C1)C)=C1C)

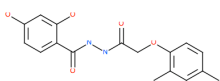**Compound # 48**

Chembridge ID 6213095

**MW** 369.4  
**Formula** C<sub>20</sub> H<sub>23</sub> N<sub>3</sub> O<sub>4</sub>  
**Name** 3-[(2,4-dihydroxybenzoyl)hydrazono]-N-mesitylbutanamide  
**LogSW** -2.526  
**RB** 5  
**tPSA** 111.02  
**hDon** 4  
**hAcc** 5  
**cLogP** 1.42  
**molLogP** 3.0898  
**SMILES** C(C(=O)NC(C(C)=CC(C)=C1)=C1C)/C(=N/NC(=O)C(C=CC(O)=C1)=C1O)C)

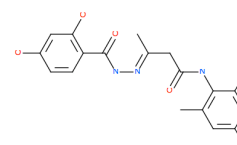

MW: molecular weight, g/mol  
 LogSW: predicted aqueous solubility  
 RB: # of rotatable bonds  
 tPSA: total polar surface area (Angstroms<sup>2</sup>)

hDon: # of hydrogen-bond donors  
 hAcc: # of hydrogen-bond acceptors  
 cLogP: predicted octanol-water partition coefficient (Chembridge algorithm)  
 molLogP: predicted octanol-water partition coefficient (Molsoft algorithm)  
 SMILES: Simplified Molecular Input Line Entry Specification

**Compound # 49**

Chembridge ID 6326744

**MW** 336.4  
**Formula** C<sub>15</sub> H<sub>16</sub> N<sub>2</sub> O<sub>5</sub> S  
**Name** N-(2-hydroxyethyl)-2-[5-(4-methoxybenzylidene)-2,4-dioxo-1,3-thiazolidin-3-yl]acetamide  
**LogSW** -2.549  
**RB** 5  
**tPSA** 95.94  
**hDon** 2  
**hAcc** 5  
**cLogP** 1.05  
**molLogP** .945202  
**SMILES** C(=C(S1)/C(N(C1=O)CC(=O)NCCO)=O)/C(C=CC(=C1)OC)=C1

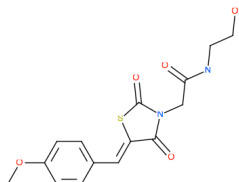**Compound # 50**

Chembridge ID 6348549

**MW** 366.4  
**Formula** C<sub>16</sub> H<sub>18</sub> N<sub>2</sub> O<sub>6</sub> S  
**Name** 2-[5-(3,4-dimethoxybenzylidene)-2,4-dioxo-1,3-thiazolidin-3-yl]-N-(2-hydroxyethyl)acetamide  
**LogSW** -2.546  
**RB** 5  
**tPSA** 105.17  
**hDon** 2  
**hAcc** 6  
**cLogP** .79  
**molLogP** .915229  
**SMILES** C(=C(S1)/C(N(C1=O)CC(=O)NCCO)=O)/C(C=CC(=C1)OC)OC=C1

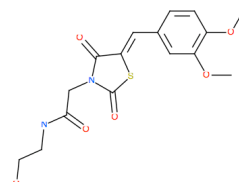**Compound # 51**

Chembridge ID 6356536

**MW** 306.3  
**Formula** C<sub>14</sub> H<sub>14</sub> N<sub>2</sub> O<sub>4</sub> S  
**Name** 2-(5-benzylidene-2,4-dioxo-1,3-thiazolidin-3-yl)-N-(2-hydroxyethyl)acetamide  
**LogSW** -2.399  
**RB** 5  
**tPSA** 86.71  
**hDon** 2  
**hAcc** 4  
**cLogP** 1.13  
**molLogP** .855157  
**SMILES** C(=C(S1)/C(N(C1=O)CC(=O)NCCO)=O)/C(C=CC=C1)=C1

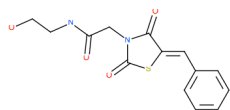**Compound # 52**

Chembridge ID 6631742

**MW** 422.4  
**Formula** C<sub>16</sub> H<sub>14</sub> N<sub>4</sub> O<sub>6</sub> S<sub>2</sub>  
**Name** N,N'-1,2-phenylenebis[2-(2,4-dioxo-1,3-thiazolidin-5-yl)acetamide]  
**LogSW** -3.205  
**RB** 6  
**tPSA** 150.54  
**hDon** 4  
**hAcc** 6  
**cLogP** -.45  
**molLogP** -.696903  
**SMILES** C([C@@H](SC(=O)N1)C1=O)C(=O)NC(C=CC=C1)=C1NC(=O)C[C@@H](SC(=O)N1)C1=O

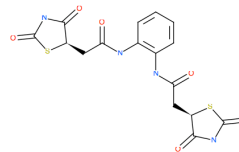

MW: molecular weight, g/mol  
 LogSW: predicted aqueous solubility  
 RB: # of rotatable bonds  
 tPSA: total polar surface area (Angstroms<sup>2</sup>)

hDon: # of hydrogen-bond donors  
 hAcc: # of hydrogen-bond acceptors  
 cLogP: predicted octanol-water partition coefficient (Chembridge algorithm)  
 molLogP: predicted octanol-water partition coefficient (Molsoft algorithm)  
 SMILES: Simplified Molecular Input Line Entry Specification



**Compound # 53**

Chembridge ID 6946462

**MW** 362.4  
**Formula** C<sub>21</sub> H<sub>18</sub> N<sub>2</sub> O<sub>4</sub>  
**Name** 3,3'-methylenebis(4-hydroxy-6-methyl-2(1H)-quinolinone)  
**LogSW** -3.695  
**RB** 2  
**tPSA** 106.18  
**hDon** 4  
**hAcc** 4  
**cLogP** 2.17  
**molLogP** 3.08223  
**SMILES** C(C(C(=O)N1)=C(C2=C1C=CC(C)=C2)O)C(C(=O)N1)=C(C2=C1C=CC(=C2)C)O

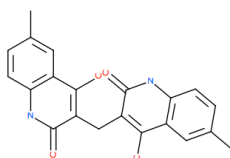**Compound # 54**

Chembridge ID 6949907

**MW** 345.3  
**Formula** C<sub>15</sub> H<sub>11</sub> N<sub>3</sub> O<sub>5</sub> S  
**Name** 2-(((2-nitrobenzoyl)amino)carbonothioyl)amino)benzoic acid  
**LogSW** -4.089  
**RB** 3  
**tPSA** 121.57  
**hDon** 3  
**hAcc** 5  
**cLogP** 2.32  
**molLogP** 1.98676  
**SMILES** O=N(=O)C(C=CC=C1)=C1C(=O)NC(=S)NC(C=CC=C1)=C1C(=O)[O-]

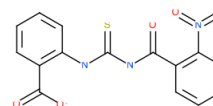**Compound # 55**

Chembridge ID 6988892

**MW** 342.4  
**Formula** C<sub>18</sub> H<sub>18</sub> N<sub>2</sub> O<sub>3</sub> S  
**Name** 3-(((3,4-dimethylbenzoyl)amino)carbonothioyl)amino)-4-methylbenzoic acid  
**LogSW** -4.711  
**RB** 3  
**tPSA** 78.43  
**hDon** 3  
**hAcc** 3  
**cLogP** 3.53  
**molLogP** 3.52074  
**SMILES** C(C(C(=O)[O-])=CC1)=C(C=1C)NC(=S)NC(=O)C(C=CC(=C1C)C)=C1

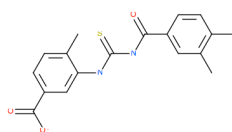**Compound # 56**

Chembridge ID 7446357

**MW** 330.4  
**Formula** C<sub>14</sub> H<sub>14</sub> N<sub>6</sub> O<sub>2</sub> S  
**Name** 2-[(5-amino-7-oxo-7,8-dihydro[1,2,4]triazolo[4,3-a]pyrimidin-3-yl)thio]-N-(4-methylphenyl)acetamide  
**LogSW** -3.189  
**RB** 4  
**tPSA** 118.17  
**hDon** 3  
**hAcc** 4  
**cLogP** -.222  
**molLogP** 1.3939  
**SMILES** C(C(=O)N1)=C(N(C1=NN1)C=1SCC(=O)NC(C=CC(=C1)C)=C1)N

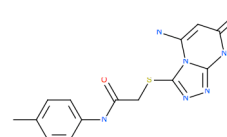

MW: molecular weight, g/mol  
 LogSW: predicted aqueous solubility  
 RB: # of rotatable bonds  
 tPSA: total polar surface area (Angstroms<sup>2</sup>)

hDon: # of hydrogen-bond donors  
 hAcc: # of hydrogen-bond acceptors  
 cLogP: predicted octanol-water partition coefficient (Chembridge algorithm)  
 molLogP: predicted octanol-water partition coefficient (Molsoft algorithm)  
 SMILES: Simplified Molecular Input Line Entry Specification

**Compound # 57**

Chembridge ID 7507803

**MW** 338.1  
**Formula** C<sub>12</sub>H<sub>8</sub>BrN<sub>3</sub>O<sub>4</sub>  
**Name** 6-[2-(4-bromophenyl)vinyl]-4-hydroxy-5-nitro-2(1H)-pyrimidinone

**LogSW** -3.035  
**RB** 2  
**tPSA** 109.12  
**hDon** 2  
**hAcc** 5  
**cLogP** 2.003

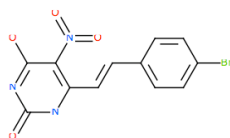

**molLogP** 1.969  
**SMILES** C(/C(NC(=O)N1)=C(C=1O)N(=O)=O)=C/C(C=CC([Br])=C1)=C1

**Compound # 58**

Chembridge ID 7530375

**MW** 344.3  
**Formula** C<sub>16</sub>H<sub>16</sub>N<sub>4</sub>O<sub>5</sub>  
**Name** 4-hydroxy-6-[2-[4-(4-morpholinyl)phenyl]vinyl]-5-nitro-2(1H)-pyrimidinone

**LogSW** -3.452  
**RB** 3  
**tPSA** 121.59  
**hDon** 2  
**hAcc** 6  
**cLogP** .96

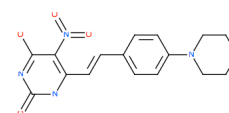

**molLogP** .975792  
**SMILES** C(/C(NC(=O)N1)=C(C=1O)N(=O)=O)=C/C(C=CC(=C1)N(CCOC2)C2)=C1

**Compound # 59**

Chembridge ID 7608933

**MW** 414.4  
**Formula** C<sub>24</sub>H<sub>18</sub>N<sub>2</sub>O<sub>5</sub>  
**Name** 4-[[[(4-methylphenyl)amino]carbonyl]phenyl (1,3-dioxo-1,3-dihydro-2H-isoindol-2-yl)]acetate

**LogSW** -5.227  
**RB** 6  
**tPSA** 92.78  
**hDon** 1  
**hAcc** 5  
**cLogP** 3.785

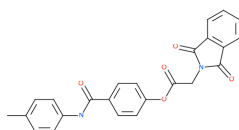

**molLogP** 3.94171  
**SMILES** C(C(=O)OC(C=CC(=C1)C(=O)NC(C=CC(C)=C2)=C2)=C1)N(C(=O)C(C=CC=C1)=C12)C2=O

**Compound # 60**

Chembridge ID 7666888

**MW** 315.3  
**Formula** C<sub>15</sub>H<sub>17</sub>N<sub>5</sub>O<sub>3</sub>  
**Name** methyl [2-((imino[(4-methylphenyl)amino]methyl)amino)-6-oxo-3,6-dihydro-4-pyrimidinyl]acetate

**LogSW** -2.315  
**RB** 6  
**tPSA** 119.96  
**hDon** 4  
**hAcc** 5  
**cLogP** -.724

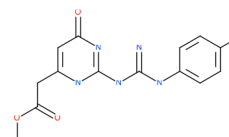

**molLogP** .491161  
**SMILES** C(C(=O)N=C(NC(=N)NC(C=CC(C)=C1)=C1)N1)=C1CC(=O)OC

MW: molecular weight, g/mol  
 LogSW: predicted aqueous solubility  
 RB: # of rotatable bonds  
 tPSA: total polar surface area (Angstroms<sup>2</sup>)

hDon: # of hydrogen-bond donors  
 hAcc: # of hydrogen-bond acceptors  
 cLogP: predicted octanol-water partition coefficient (Chembridge algorithm)  
 molLogP: predicted octanol-water partition coefficient (Molsoft algorithm)  
 SMILES: Simplified Molecular Input Line Entry Specification
