# Supplementary material for: Inhibition by stabilization: targeting the Plasmodium falciparum aldolase–TRAP complex
Source: Springer Nature journal article supplement (doi:10.1186/s12936-015-0834-9), 2015-08-19
Supplement: MOESM6 [file 9761538]

**Additional file 6:**

Sporozoite motility assay results for all compounds tested

The effect on sporozoite motility was measured for a subset of the VLS hits.

| Compound # | # of parasites counted | % motile cells | % with 1 trail | % with 2-10 trails | % with > 10 trails |
|------------|------------------------|----------------|----------------|--------------------|--------------------|
| DMSO       | 136                    | 85             | 1              | 9                  | 75                 |
| 1          | 97                     | 70             | 3              | 7                  | 60                 |
| 3          | 85                     | 73             | 1              | 5                  | 67                 |
| 5          | 90                     | 74             | 3              | 2                  | 69                 |
| 18         | 91                     | 74             | 3              | 4                  | 66                 |
| 19         | 88                     | 76             | 5              | 8                  | 64                 |
| 21         | 76                     | 74             | 1              | 5                  | 67                 |
| 24         | 145                    | 33             | 3              | 7                  | 23                 |
| 29         | 86                     | 59             | 2              | 12                 | 45                 |
| 32         | 85                     | 82             | 5              | 2                  | 75                 |
| 36         | 91                     | 75             | 2              | 8                  | 65                 |
| 42         | 177                    | 38             | 6              | 7                  | 25                 |
| 43         | 92                     | 68             | 1              | 2                  | 65                 |

**Sporozoite motility assay results for replicates of compounds 24 and 42**

The motility assay was repeated in triplicate for compounds 24 and 42. The results are shown below.

| Compound #   | # of parasites counted | % motile cells | % with 1 trail | % with 2-10 trails | % with > 10 trails |
|--------------|------------------------|----------------|----------------|--------------------|--------------------|
| DMSO (1)     | 124                    | 82             | 2              | 10                 | 70                 |
| DMSO (2)     | 106                    | 83             | 4              | 9                  | 70                 |
| DMSO (3)     | 115                    | 78             | 2              | 8                  | 69                 |
| DMSO Average | 115                    | 81             | 3              | 9                  | 70                 |
| 24 (1)       | 116                    | 32             | 3              | 8                  | 21                 |
| 24 (2)       | 125                    | 26             | 0              | 2                  | 24                 |
| 24 (3)       | 126                    | 21             | 2              | 5                  | 14                 |
| 24 Average   | 122                    | 26             | 2              | 5                  | 20                 |
| 42 (1)       | 129                    | 46             | 7              | 9                  | 30                 |
| 42 (2)       | 128                    | 53             | 5              | 14                 | 34                 |
| 42 (3)       | 121                    | 50             | 5              | 17                 | 28                 |
| 42 Average   | 126                    | 50             | 6              | 13                 | 31                 |
