# Supplementary material for: Inhibition by stabilization: targeting the Plasmodium falciparum aldolase–TRAP complex
Source: Springer Nature journal article supplement (doi:10.1186/s12936-015-0834-9), 2015-08-19

**Additional file 7: Ligplot representation of the TRAP peptides. Each TRAP peptide is represented with it's corresponding interacting residues in addition to hydrogen bonding distances.**

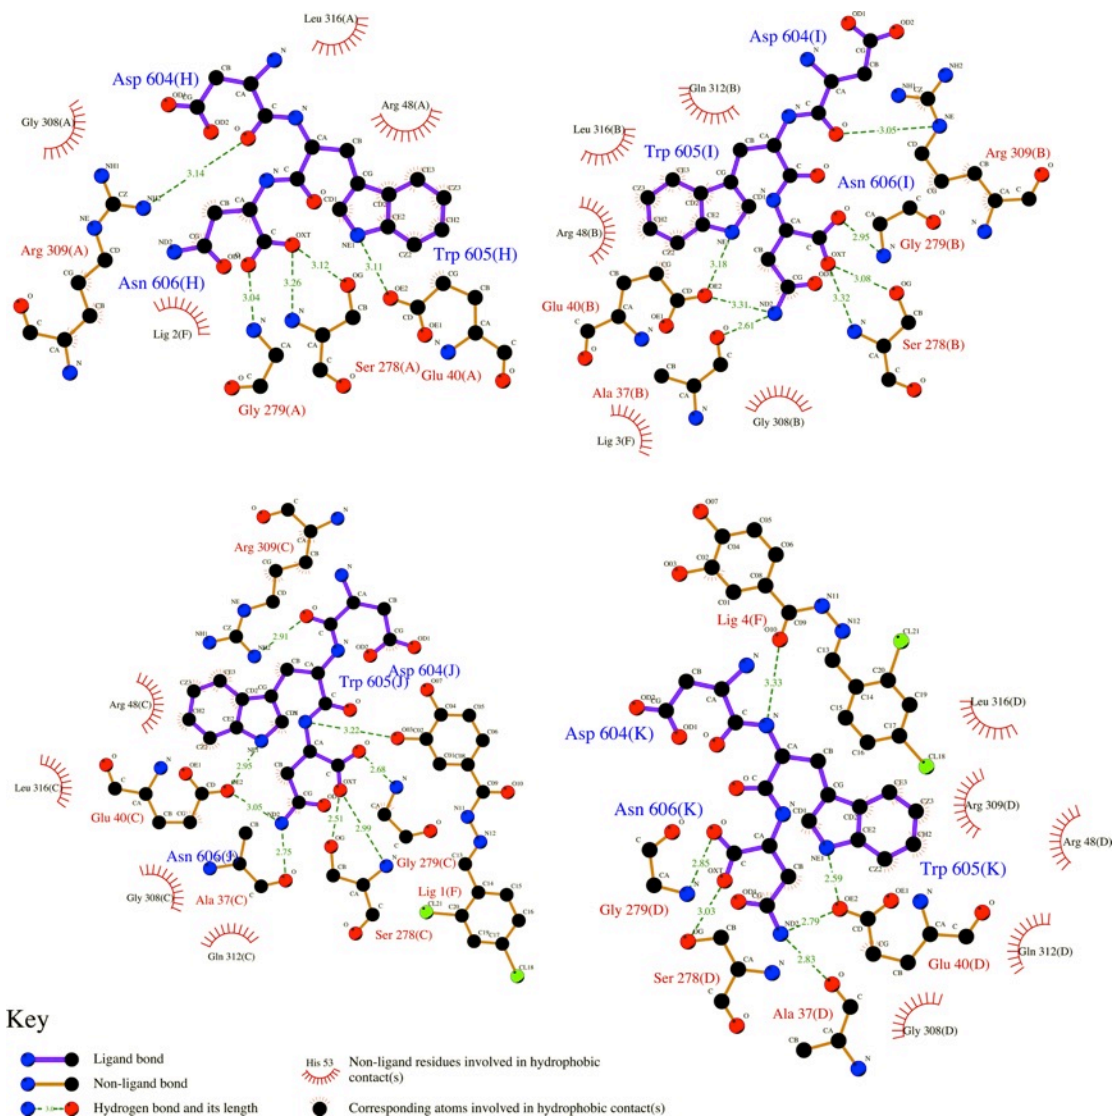

Supplement: MOESM7 [file 9761538]
