# Supplementary material for: Inhibition by stabilization: targeting the Plasmodium falciparum aldolase–TRAP complex
Source: Springer Nature journal article supplement (doi:10.1186/s12936-015-0834-9), 2015-08-19

**Additional file 8: Ligplot representation of the Compound 24 molecules.**  
 Each Compound 24 molecule is represented with it's corresponding interacting residues in addition to hydrogen bonding distances.

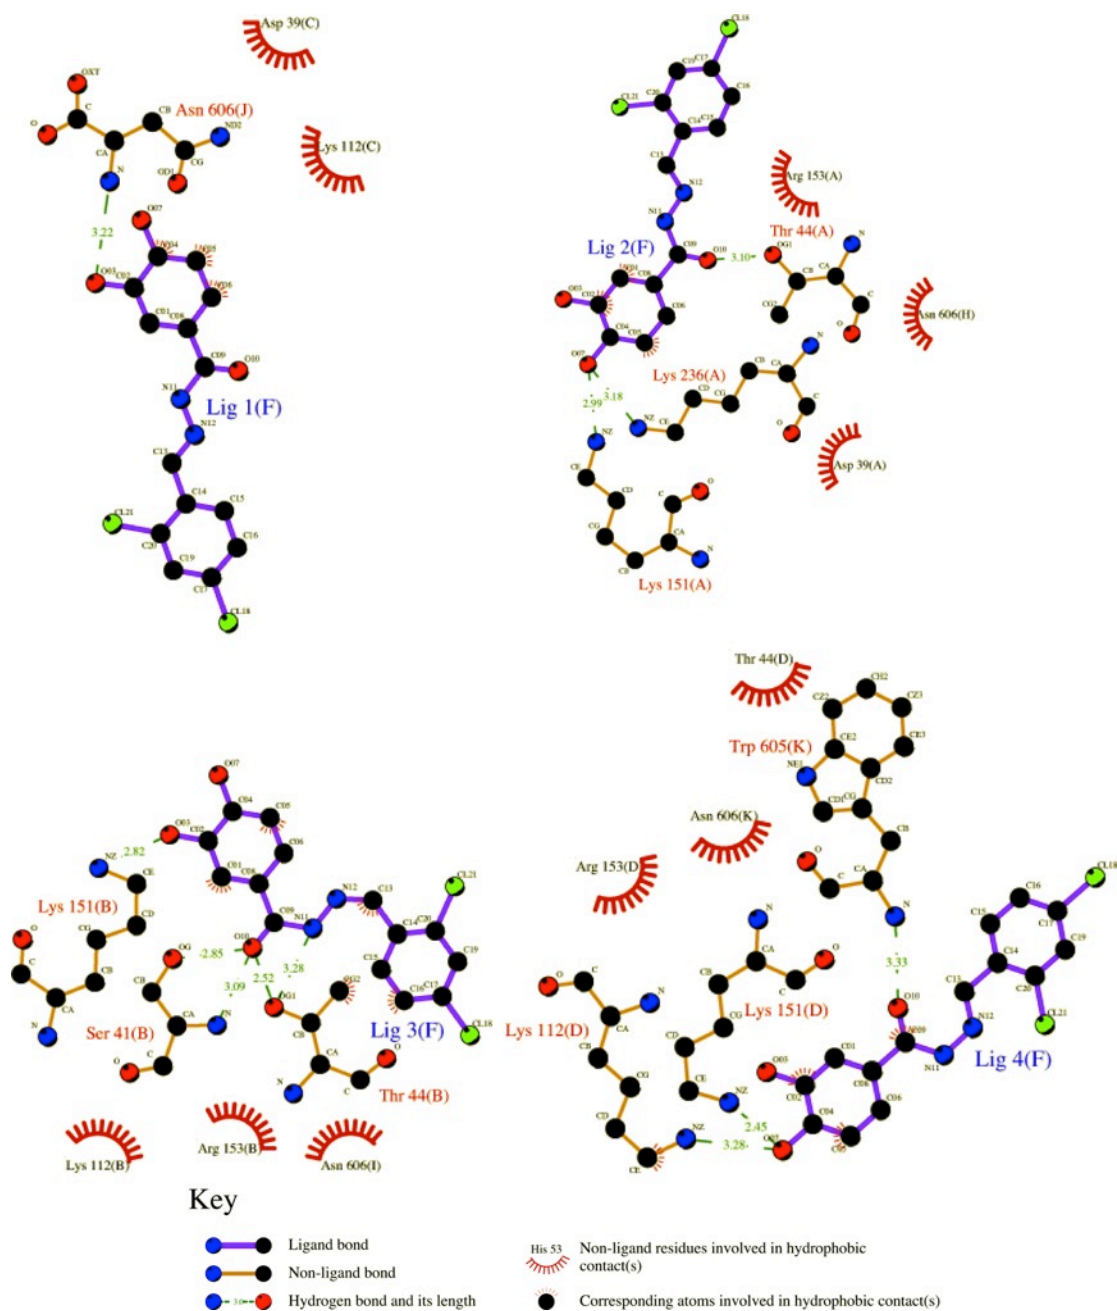

Supplement: MOESM8 [file 9761538]
