# Supplementary material for: Inhibition by stabilization: targeting the Plasmodium falciparum aldolase–TRAP complex
Source: Springer Nature journal article supplement (doi:10.1186/s12936-015-0834-9), 2015-08-19

**Additional file 9: Stereo figures of each PfAldolase subunit bound to TRAP and C24.** Stereo figures represent a close-up view of approximately the same orientation as depicted in Figure 5A of the main text. Each subunit is shown as ribbon representation with the 2Fo-Fc map contoured at 1.5 $\sigma$  and the Fo-Fc difference density map at 3 $\sigma$  levels.

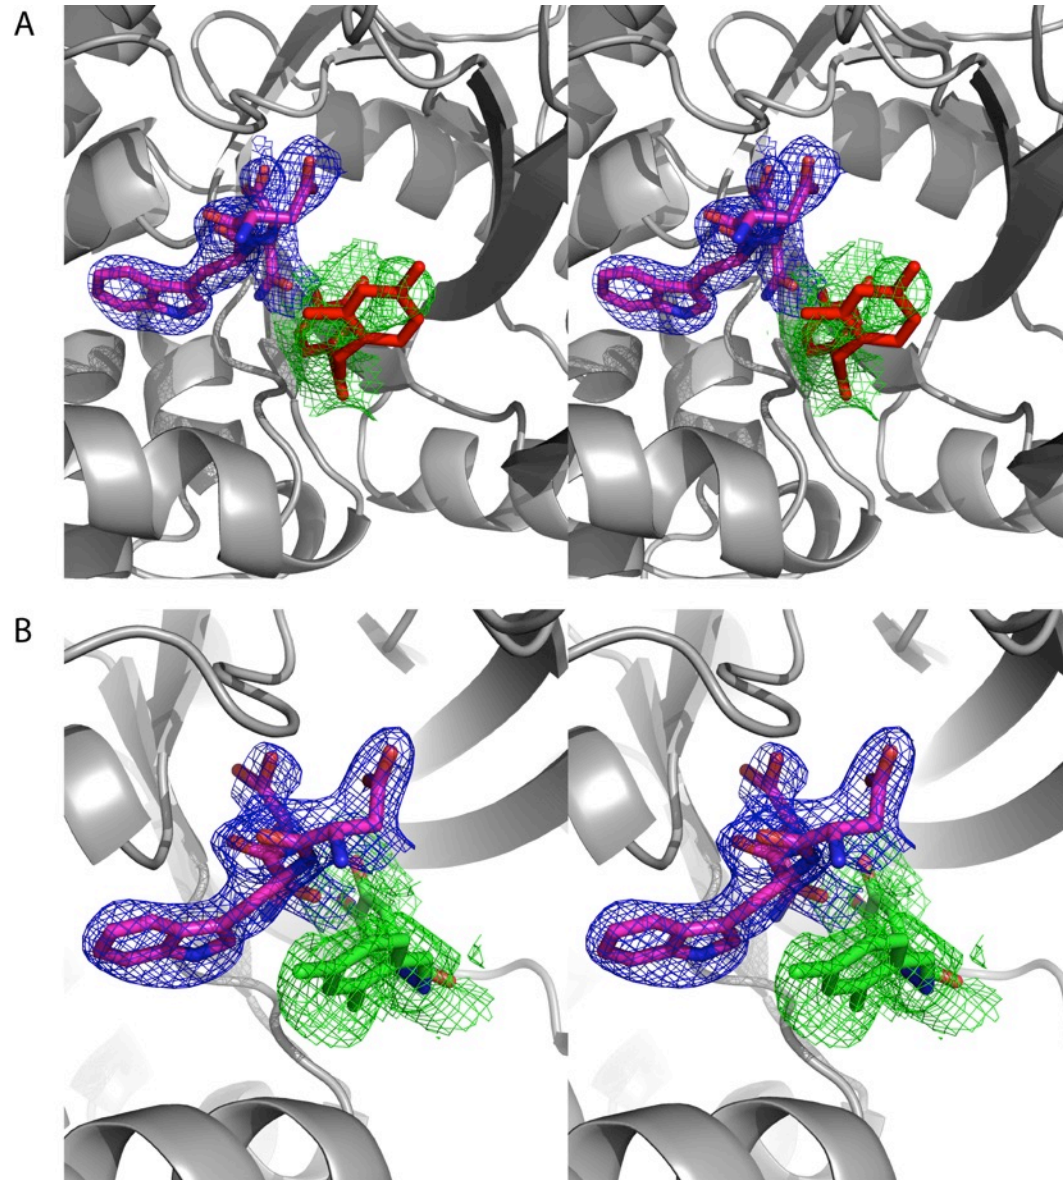

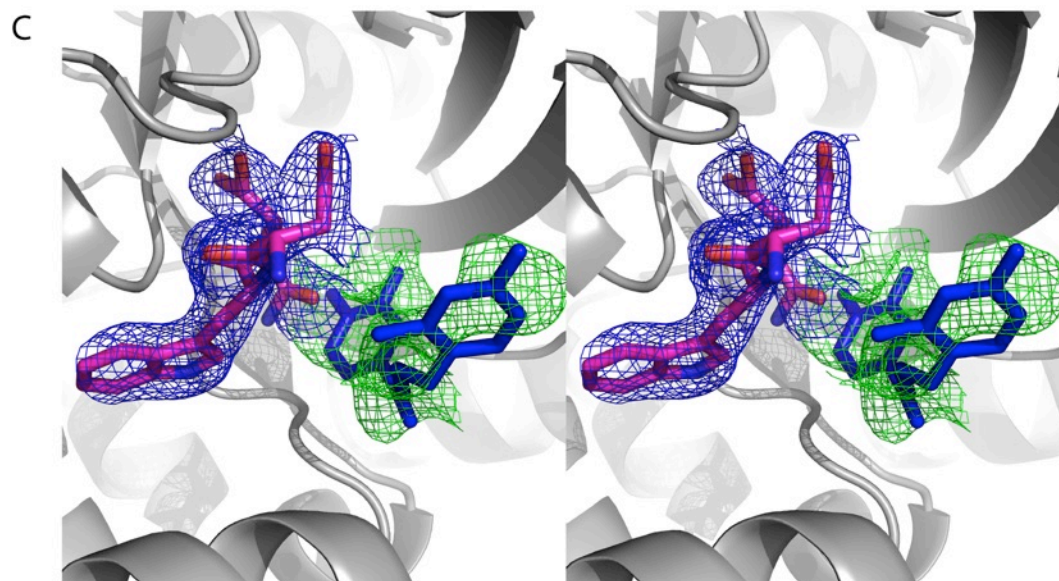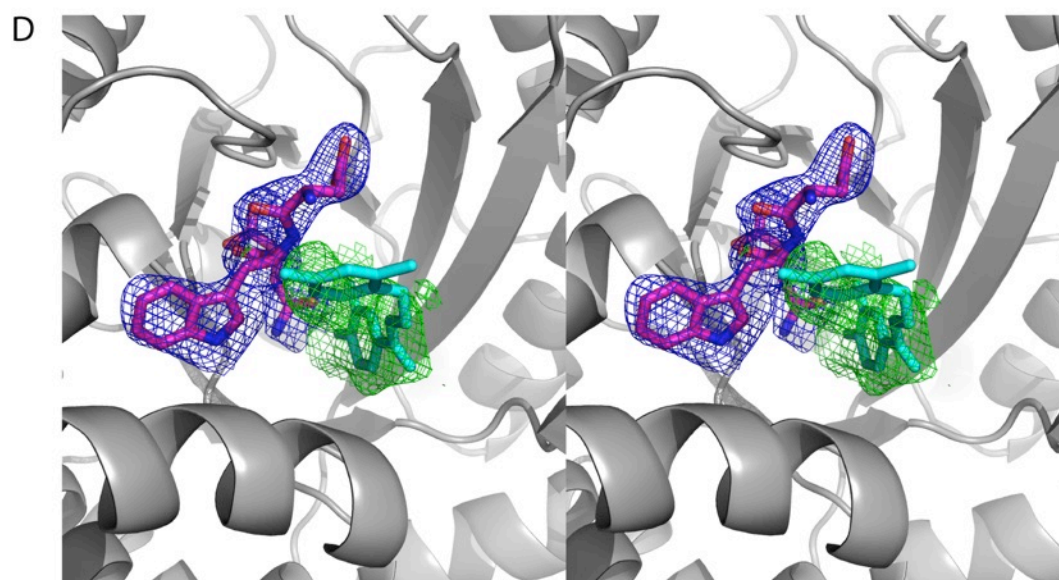

Supplement: MOESM9 [file 9761538]
