# Supplementary material for: Inhibition by stabilization: targeting the Plasmodium falciparum aldolase–TRAP complex
Source: Springer Nature journal article supplement (doi:10.1186/s12936-015-0834-9), 2015-08-19

**Additional file 10: Stereo figure of Compound 24 in the crystal structure compared to the docking pose obtained with 2PC4.** A) Comparison between the docked pose (cyan sticks) and the observed orientation of compound 24 (orange sticks) in Chain A of the PfAldolase tetramer. The coordinates of 2PC4 are represented as ribbons and the corresponding TRAP-tail is shown in magenta sticks. The TRAP-tail of the ternary co-crystal structure 4TR9 is shown in orange sticks. B) Approximate rotation of 90 degrees towards the viewer compared to figure A.

A

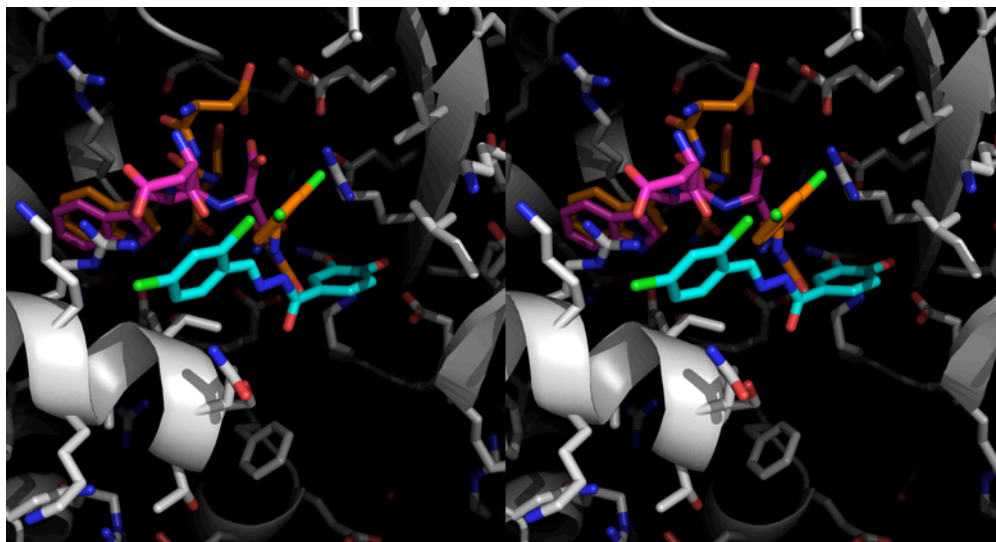

B

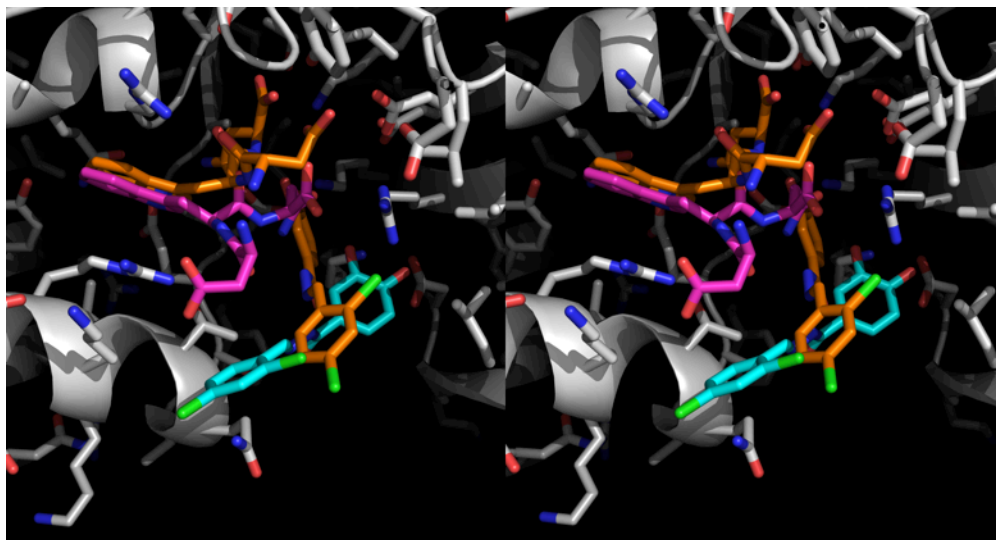

Supplement: MOESM12 [file 9761538]
