# Supplementary material for: Inhibition by stabilization: targeting the Plasmodium falciparum aldolase–TRAP complex
Source: Springer Nature journal article supplement (doi:10.1186/s12936-015-0834-9), 2015-08-19
Supplement: MOESM13 [file 9761538]

## Additional File 11: Identified C24 scaffold homologs within the TCAMs dataset.

The GSK TCAMs Dataset (hits from *P. falciparum* whole-cell screening) contains several active compounds with our identified scaffold as shown in Figure 4A. All 26784 active compounds from this dataset were structurally compared using ROCS from OpenEye Software, yielding several C24-homologs. The 25 closest hits based on shape and chemical similarity are shown below.

|   | Molecule                                                                                            | SOURCES            | Molecule                                                                                            | SOURCES            | Molecule                                                                                            | SOURCES            | Molecule                                                                                             | SOURCES            | Molecule                                                                                              | SOURCES            |
|---|-----------------------------------------------------------------------------------------------------|--------------------|-----------------------------------------------------------------------------------------------------|--------------------|-----------------------------------------------------------------------------------------------------|--------------------|------------------------------------------------------------------------------------------------------|--------------------|-------------------------------------------------------------------------------------------------------|--------------------|
| 1 | 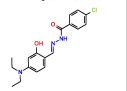<br>omega_27397_8  | 434141<br>(CHEMBL) | <br>omega_28907_3  | 434229<br>(CHEMBL) | <br>omega_29731_0  | 434464<br>(CHEMBL) | <br>omega_28061_1  | 434136<br>(CHEMBL) | <br>omega_29639_1  | 434432<br>(CHEMBL) |
| 2 | <br>omega_32148_8  | 434095<br>(CHEMBL) | <br>omega_22702_4  | 434110<br>(CHEMBL) | <br>omega_35417_1  | 434824<br>(CHEMBL) | <br>omega_30875_0  | 434196<br>(CHEMBL) | <br>omega_33760_1  | 434495<br>(CHEMBL) |
| 3 | <br>omega_31436_0  | 434395<br>(CHEMBL) | <br>omega_36387_2  | 434258<br>(CHEMBL) | <br>omega_30567_1  | 434279<br>(CHEMBL) | <br>omega_30271_1  | 434038<br>(CHEMBL) | <br>omega_30149_1  | 434183<br>(CHEMBL) |
| 4 | <br>omega_33868_2  | 434099<br>(CHEMBL) | <br>omega_24992_2  | 434110<br>(CHEMBL) | <br>omega_31957_1  | 434105<br>(CHEMBL) | <br>omega_22828_0  | 434118<br>(CHEMBL) | <br>omega_23220_1  | 434096<br>(CHEMBL) |
| 5 | <br>omega_33868_3 | 434271<br>(CHEMBL) | <br>omega_40051_0 | 434517<br>(CHEMBL) | <br>omega_27915_1 | 434424<br>(CHEMBL) | <br>omega_23439_1 | 434117<br>(CHEMBL) | <br>omega_30715_1 | 434103<br>(CHEMBL) |
